# Supplementary material for: Comparing bioinformatic pipelines for microbial 16S rRNA amplicon sequencing
Source: PLoS One. 2020 Jan 16;15(1):e0227434. doi: 10.1371/journal.pone.0227434 (PMC6964864; doi:10.1371/journal.pone.0227434)
Supplement: S1 Table — Accession number, 16S rRNA gene copy number, and number of 16S rRNA gene amplicon variants are given for each mock community member. (XLSX) [file pone.0227434.s002.xlsx]

## Sheet: Mock_Composition
Species	Strain	NCBI_reference	16S Copy Number	16S variants in V4 region
Acinetobacter baumannii	ATCC 17978	NC_009085	5	1
Actinomyces odontolyticus	ATCC 17982	NZ_AAYI02000000	2	1
Bacillus cereus	ATCC 10987	NC_003909	12	1
Bacteroides vulgatus*	ATCC 8482	NC_009614	7	3 (5:1:1 ration)
Clostridium beijerinckii*	NCIMB 8052	NC_009617	14	2 ( 13:1 ration)
Deinococcus radiodurans	R1 (smooth)	NC_001263 and NC_001264	3	1
Enterococcus faecalis	OG1RF	NC_17316	4	1
Escherichia coli	K12 substrain MG1655	NC_000913	7	1
Helicobacter pylori	26695	NC_000915	2	1
Lactobacillus gasseri	63 AM	NC_008530	6	1
Listeria monocytogenes	EGDe	NC_003210	6	1
Neisseria meningitidis	MC58	NC_003112	4	1
Propionibacterium acnes	KPA171202	NC_006085	3	1
Pseudomonas aeruginosa	PAO1-LAC	NC_002516	4	1
Rhodobacter sphaeroides	ATH 2.4.1	NC_007493 and NC_007494	3	1
Staphylococcus aureus#	TCH1516	NC_010079	5	1 (V4 identical to S. epidermidis)
Staphylococcus epidermidis#	FDA strain PCI 1200	NC_004461	5	1 (V4 identical to S. aureus)
Streptococcus agalactiae	2603 V/R	NC_004116	7	1
Streptococcus mutans	UA159	NC_004350	5	1
Streptococcus pneumoniae	TIGR4	NC_003028	4	1
